# Supplementary material for: SOX15 Governs Transcription in Human Stratified Epithelia and a Subset of Esophageal Adenocarcinomas
Source: PubMed Central journal article supplement — Cell Mol Gastroenterol Hepatol. 2015 Aug 5;1(6):598–609.e6. doi: 10.1016/j.jcmgh.2015.07.009 (PMC4620585; doi:10.1016/j.jcmgh.2015.07.009), 2015-08-05
Supplement: NIHMS726236-supplement-01.pdf [file NIHMS726236-supplement-01.pdf]

## **SUPPLEMENTAL MATERIALS**

**Supplemental Figure 1. Genes co-expressed with *SOX15* in The Cancer Genome Atlas (TCGA) dataset of gastric cancers.** (A) Correlations of all mRNAs with *SOX15* levels. The 317 genes co-expressed with *SOX15* in esophageal epithelium are marked with red lines. (B) Expression of *SOX15*-coexpressed genes in 30 cases of CIN<sup>+</sup> (chromosomal instability) adenocarcinomas from the G-E junction or gastric cardia.

**Supplemental Table 1. Top Gene Ontology (GO) terms for transcripts altered after *SOX15* depletion in CPA cells**

**Supplemental Table 2. Genes co-expressed with *SOX15* in a large collection of primary esophagus, BE and EAC specimens ( $r > 0.81$ )**

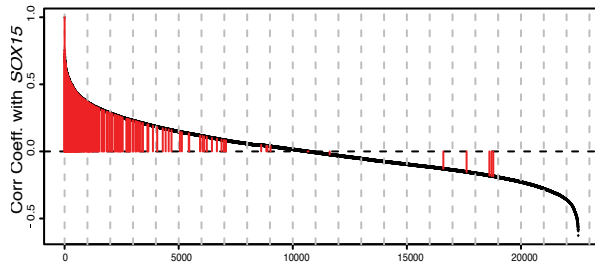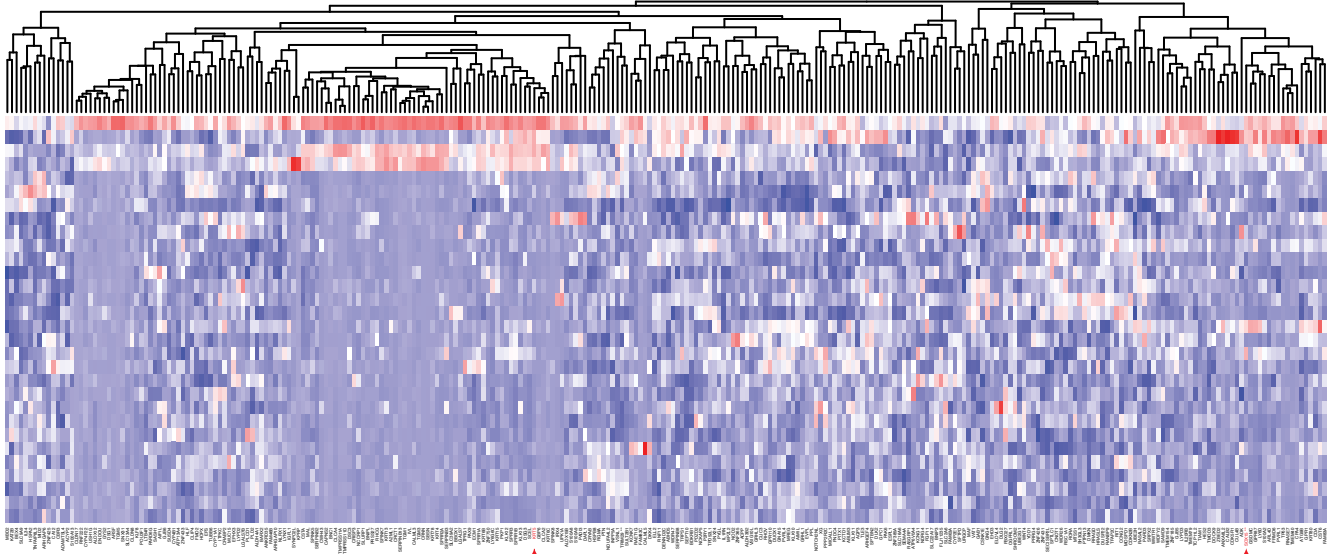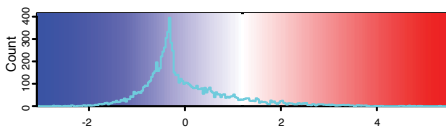

KRT5

SOX15

| Term RNAseq Down                            |          |                                                  | PValue   |
|---------------------------------------------|----------|--------------------------------------------------|----------|
| GO:0000278~mitotic cell cycle               | 3.26E-20 | GO:0000079~regulation of cyclin-dependent protei | 4.40E-06 |
| GO:0051301~cell division                    | 6.39E-20 | GO:0016192~vesicle-mediated transport            | 6.89E-06 |
| GO:0000280~nuclear division                 | 1.39E-19 | GO:0051726~regulation of cell cycle              | 8.53E-06 |
| GO:0007067~mitosis                          | 1.39E-19 | GO:0009991~response to extracellular stimulus    | 3.09E-05 |
| GO:0022403~cell cycle phase                 | 1.48E-19 | GO:0006091~generation of precursor metabolites ; | 5.73E-05 |
| GO:0000087~M phase of mitotic cell cycle    | 1.52E-19 | GO:0045767~regulation of anti-apoptosis          | 7.05E-05 |
| GO:0022402~cell cycle process               | 4.58E-19 | GO:0031667~response to nutrient levels           | 1.71E-04 |
| GO:0007049~cell cycle                       | 2.49E-18 | GO:0007584~response to nutrient                  | 2.63E-04 |
| GO:0000279~M phase                          | 2.96E-18 | GO:0008219~cell death                            | 5.87E-04 |
| GO:0048285~organelle fission                | 3.08E-18 | GO:0010033~response to organic substance         | 6.29E-04 |
| GO:0007059~chromosome segregation           | 1.93E-10 | GO:0042981~regulation of apoptosis               | 6.32E-04 |
| GO:0008104~protein localization             | 4.68E-10 | GO:0055114~oxidation reduction                   | 6.36E-04 |
| GO:0045184~establishment of protein locali. | 5.39E-10 | GO:0042127~regulation of cell proliferation      | 6.77E-04 |
| GO:0008654~phospholipid biosynthetic proc   | 6.48E-10 | GO:0016265~death                                 | 6.77E-04 |
| GO:0015031~protein transport                | 2.46E-09 | GO:0043067~regulation of programmed cell death   | 7.56E-04 |

| <b>GENE</b> | <b>Correlation<br/>with SOX15<br/>expression</b> |
|-------------|--------------------------------------------------|
| SOX15       | 1.000                                            |
| GRHL3       | 0.981                                            |
| FAM46B      | 0.981                                            |
| ZNF750      | 0.981                                            |
| LYPD3       | 0.981                                            |
| CAPNS2      | 0.979                                            |
| IL20RB      | 0.978                                            |
| BNIP1       | 0.978                                            |
| ANXA8L2     | 0.975                                            |
| GPR87       | 0.971                                            |
| TMPRSS11D   | 0.971                                            |
| LY6D        | 0.971                                            |
| LASS3       | 0.971                                            |
| CLCA2       | 0.971                                            |
| PKP1        | 0.971                                            |
| KRT5        | 0.971                                            |
| GSDMC       | 0.970                                            |
| TMEM40      | 0.970                                            |
| FAM83C      | 0.970                                            |
| TP63        | 0.970                                            |
| DSC3        | 0.970                                            |
| TGM5        | 0.964                                            |
| TMPRSS11A   | 0.964                                            |
| GJB6        | 0.964                                            |
| KLK13       | 0.964                                            |
| LYNX1       | 0.964                                            |
| SPINK5      | 0.961                                            |
| ENDOU       | 0.961                                            |
| RNF222      | 0.961                                            |
| PRSS27      | 0.961                                            |
| KRT78       | 0.961                                            |
| CRCT1       | 0.961                                            |
| SCEL        | 0.961                                            |
| A2ML1       | 0.961                                            |
| SLURP1      | 0.961                                            |
| c9orf169    | 0.961                                            |
| CSTA        | 0.961                                            |
| MAL         | 0.961                                            |
| KRT6C       | 0.961                                            |
| ARHGAP6     | 0.961                                            |
| DSG3        | 0.961                                            |
| TGM1        | 0.961                                            |
| SBSN        | 0.961                                            |

|           |       |
|-----------|-------|
| SPRR1B    | 0.961 |
| CLCA4     | 0.961 |
| CALML3    | 0.961 |
| RHCG      | 0.961 |
| KRT4      | 0.961 |
| SERPINB13 | 0.961 |
| GBP6      | 0.961 |
| NCCRP1    | 0.961 |
| TMRSS11B  | 0.961 |
| CNFN      | 0.961 |
| TGM3      | 0.961 |
| CRNN      | 0.961 |
| HSPB8     | 0.961 |
| SERPINB2  | 0.961 |
| S100A2    | 0.961 |
| LGALS7B   | 0.952 |
| LGALS7    | 0.952 |
| DUOX1     | 0.949 |
| DUOXA1    | 0.949 |
| CSNK1E    | 0.944 |
| CLIC3     | 0.942 |
| HOPX      | 0.940 |
| SERPINB4  | 0.939 |
| SERPINB3  | 0.939 |
| ECM1      | 0.937 |
| Trim29    | 0.937 |
| SLC39A2   | 0.937 |
| RAET1G    | 0.937 |
| AQP3      | 0.937 |
| TMEM154   | 0.937 |
| GNA15     | 0.937 |
| SULT2B1   | 0.937 |
| ALDH3B2   | 0.937 |
| EVPL      | 0.937 |
| GRHL1     | 0.937 |
| KAZ       | 0.937 |
| PITX1     | 0.937 |
| TMEM79    | 0.937 |
| DENND2C   | 0.937 |
| VSIG10L   | 0.937 |
| ZNF185    | 0.937 |
| PPL       | 0.937 |
| GJB5      | 0.937 |
| KRT15     | 0.937 |
| c10orf99  | 0.931 |
| EPHX3     | 0.928 |

|           |       |
|-----------|-------|
| AIF1L     | 0.928 |
| CRABP2    | 0.928 |
| PPP1R3C   | 0.917 |
| ZNF365    | 0.916 |
| CPA4      | 0.916 |
| SPINK7    | 0.916 |
| RNASE7    | 0.916 |
| LOC643479 | 0.916 |
| TIAM1     | 0.912 |
| ARL4D     | 0.912 |
| LASS4     | 0.912 |
| IVL       | 0.912 |
| P2RY1     | 0.912 |
| DLK2      | 0.912 |
| ANXA8     | 0.912 |
| BBOX1     | 0.911 |
| CYP4F22   | 0.911 |
| SCNN18    | 0.911 |
| MUC15     | 0.911 |
| CWH43     | 0.911 |
| CALML5    | 0.909 |
| CST6      | 0.906 |
| FAM83A    | 0.904 |
| CDA       | 0.904 |
| KRT80     | 0.904 |
| LYPD2     | 0.901 |
| FGF11     | 0.899 |
| PPP2R2C   | 0.899 |
| TLE3      | 0.881 |
| DOCK9     | 0.881 |
| PLD2      | 0.881 |
| PYGL      | 0.881 |
| BNIP3     | 0.881 |
| TUBB6     | 0.881 |
| NDUFA4L2  | 0.881 |
| BDKRB1    | 0.881 |
| NDRG4     | 0.881 |
| CBR3      | 0.881 |
| SLC22A17  | 0.881 |
| SRPX2     | 0.881 |
| FRMD6     | 0.881 |
| MID2      | 0.881 |
| EFS       | 0.881 |
| PARD6G    | 0.881 |
| c3orf54   | 0.881 |
| RGMA      | 0.881 |

|           |       |
|-----------|-------|
| RRAGD     | 0.881 |
| ANKRD35   | 0.881 |
| TNFAIP8L3 | 0.881 |
| ELOVL4    | 0.881 |
| CRYAB     | 0.881 |
| GPC1      | 0.881 |
| ZNF385A   | 0.881 |
| WDFY2     | 0.881 |
| NOD2      | 0.881 |
| PTPN13    | 0.881 |
| TFAP2C    | 0.881 |
| CDK5R1    | 0.881 |
| VSNL1     | 0.881 |
| MICALL1   | 0.872 |
| PAK6      | 0.872 |
| PVRL1     | 0.872 |
| PVRL4     | 0.872 |
| ITPKC     | 0.872 |
| SPTBN2    | 0.872 |
| SAMD9     | 0.872 |
| AIM1L     | 0.872 |
| PLCD1     | 0.872 |
| NLRX1     | 0.872 |
| MPZL2     | 0.872 |
| PRRG4     | 0.872 |
| PPP1R13L  | 0.872 |
| URGCP     | 0.872 |
| XG        | 0.863 |
| HES2      | 0.863 |
| c12orf54  | 0.863 |
| IRX4      | 0.863 |
| DST       | 0.863 |
| BNC1      | 0.863 |
| ARHGEF4   | 0.858 |
| DMKN      | 0.855 |
| KLK10     | 0.855 |
| LTB4R     | 0.855 |
| CYP2E1    | 0.853 |
| KCTD1     | 0.852 |
| ATP13A4   | 0.849 |
| ATP6V0A4  | 0.849 |
| RASGRP1   | 0.849 |
| TRIM6     | 0.849 |
| SHROOM2   | 0.849 |
| CLIP4     | 0.849 |
| KLK12     | 0.840 |

|           |       |
|-----------|-------|
| S100A8    | 0.840 |
| S100A9    | 0.840 |
| KRT6B     | 0.840 |
| SPRR3     | 0.840 |
| KRT13     | 0.840 |
| SPRR1A    | 0.840 |
| SPRR2A    | 0.840 |
| NCKAP5    | 0.833 |
| GPR1      | 0.833 |
| CDKN2B    | 0.833 |
| LOC653110 | 0.833 |
| SFTPD     | 0.833 |
| FBXO27    | 0.833 |
| ZNF433    | 0.824 |
| CA12      | 0.824 |
| WNT4      | 0.824 |
| MTSS1     | 0.824 |
| WDR47     | 0.824 |
| ELL2      | 0.824 |
| RORA      | 0.824 |
| SLC9A9    | 0.824 |
| SEMA4A    | 0.824 |
| MAF       | 0.824 |
| BEX4      | 0.824 |
| SERPINB8  | 0.824 |
| ZDHHC21   | 0.824 |
| ZNF425    | 0.824 |
| SNX24     | 0.824 |
| ALDH4A1   | 0.824 |
| NOTCH2NL  | 0.824 |
| DUSP22    | 0.824 |
| MBD2      | 0.824 |
| C4ORF3    | 0.824 |
| CNOT1     | 0.824 |
| CTTNBP2NL | 0.824 |
| CUL4B     | 0.824 |
| ADK       | 0.824 |
| MOSPD1    | 0.824 |
| PDZD2     | 0.824 |
| CAB39P    | 0.824 |
| ZNF431    | 0.824 |
| RASAL2    | 0.824 |
| TMOD3     | 0.824 |
| ARHGAP10  | 0.824 |
| DAPP1     | 0.824 |
| SLC2A6    | 0.824 |



|           |       |
|-----------|-------|
| ZNF426    | 0.824 |
| RIT1      | 0.824 |
| UBE2H     | 0.824 |
| SPTLC1    | 0.824 |
| KAT2B     | 0.824 |
| SECISBP2L | 0.824 |
| KIAA1370  | 0.824 |
| RNF11     | 0.824 |
| WDR26     | 0.824 |
| RANBP9    | 0.824 |
| ABHD5     | 0.824 |
| YOD1      | 0.824 |
| SEPT10    | 0.824 |
| UBE2G1    | 0.824 |
| SASH1     | 0.824 |
| GAB1      | 0.824 |
| PARD3     | 0.824 |
| RSC1A1    | 0.824 |
| TPD52L1   | 0.824 |
| IL34      | 0.824 |
| HRASLS    | 0.824 |
| ESPL1     | 0.824 |
| TRPS1     | 0.824 |
| KCNG1     | 0.824 |
| HSPA2     | 0.824 |
| ABLIM3    | 0.824 |
| FNDC4     | 0.824 |
| VAT1      | 0.824 |
| FLJ11235  | 0.824 |
| DKK4      | 0.824 |
| WWTR1     | 0.824 |
| ATG9B     | 0.824 |
| PADI3     | 0.824 |
| SYNPO2L   | 0.824 |
| TCP11L2   | 0.824 |
| CCNG2     | 0.824 |
| GPR110    | 0.824 |
| SPINK8    | 0.824 |
| GYS2      | 0.824 |
| INPP5A    | 0.824 |
| ILI2A     | 0.824 |
| UPK1A     | 0.824 |
| KCNK7     | 0.824 |
| CYP4B1    | 0.824 |
| SYNGR1    | 0.824 |
| OGFRL1    | 0.824 |

|          |       |
|----------|-------|
| SLC16A6  | 0.824 |
| HLF      | 0.824 |
| DLG2     | 0.824 |
| CYP11A1  | 0.824 |
| PTN      | 0.824 |
| BARX2    | 0.824 |
| CLDN8    | 0.824 |
| RHOV     | 0.824 |
| C1ORF161 | 0.824 |
| SNX31    | 0.824 |
| ACPP     | 0.824 |
| S100A13  | 0.824 |
| USH1G    | 0.824 |
| GNG4     | 0.824 |
| ADAMTSL4 | 0.824 |
| SLC13A4  | 0.824 |
| POU3F1   | 0.824 |
| IL1RN    | 0.824 |
| IL1F6    | 0.824 |
| KLK11    | 0.824 |
| MREG     | 0.824 |
| ZBED2    | 0.824 |
| CALB2    | 0.824 |
| ALOX12   | 0.824 |
| CRISP3   | 0.824 |
| EHD3     | 0.824 |
| ACYP2    | 0.824 |
| C2ORF54  | 0.824 |
| KLF8     | 0.824 |
| KREMN1   | 0.824 |
| TPRG1    | 0.824 |
| PAX9     | 0.824 |
| SUSD4    | 0.824 |
| DAPL1    | 0.824 |
| ARSF     | 0.816 |
| ALOX15B  | 0.816 |
| C18ORF26 | 0.816 |
| FMO2     | 0.816 |
| FAM63A   | 0.806 |
| SH3GL3   | 0.806 |
| LY6G6C   | 0.806 |
| DSG1     | 0.806 |
| CLDN17   | 0.806 |
| KPRP     | 0.806 |
| IGFL1    | 0.806 |
